# Supplementary material for: Evaluation of toxicity and apoptotic effects of copper nanoparticles in combination with imatinib on chronic myeloid leukemia cells
Source: Research Square preprint supplement (doi:10.21203/rs.3.rs-7627097/v1), 2025-10-03
Supplement: Supplementary file 1 [file 93edc6ad1dd1fece607e77a2.docx]

**Evaluation of toxicity and apoptotic effects of copper nanoparticles in combination with imatinib on chronic myeloid leukemia cells**

Mohammad Ebrahimi Torkamani1, Mahshid Mohammadian2*, Farzaneh Kefayatirad3, Safiyeh Aghazadeh4, Mohammad Taghi Goodarzi1*

1 Department of Biochemistry, Sha.C., Islamic Azad University, Shahrood, Iran

2 Department of clinical biochemistry, School of medicine, Urmia university of medical sciences, Urmia, Iran

3 Department of Biochemistry, Dorevitch Pathology, Heidelberg, VIC 3084, Australia

4 Department of Basic Sciences, Faculty of Veterinary Medicine, Urmia University, Urmia, Iran

***Corresponding authors:**

Mohammad Taghi Goodarzi, Department of Biochemistry, Sha.C., Islamic Azad University, Shahrood, Iran. Tel: +982332390077, Email: [mt.goodarzi@iau.ac.ir](mailto:mt.goodarzi@iau.ac.ir) ORCID: 0000-0002-5546-5812

Mahshid Mohammadian, Department of clinical biochemistry, School of medicine, Urmia university of medical sciences, Urmia, Iran. Tel: +982332390077, Email: Biochem426@gmail.com

**Running Title:** **toxicity and apoptotic effects of copper nanoparticles in combination with imatinib**


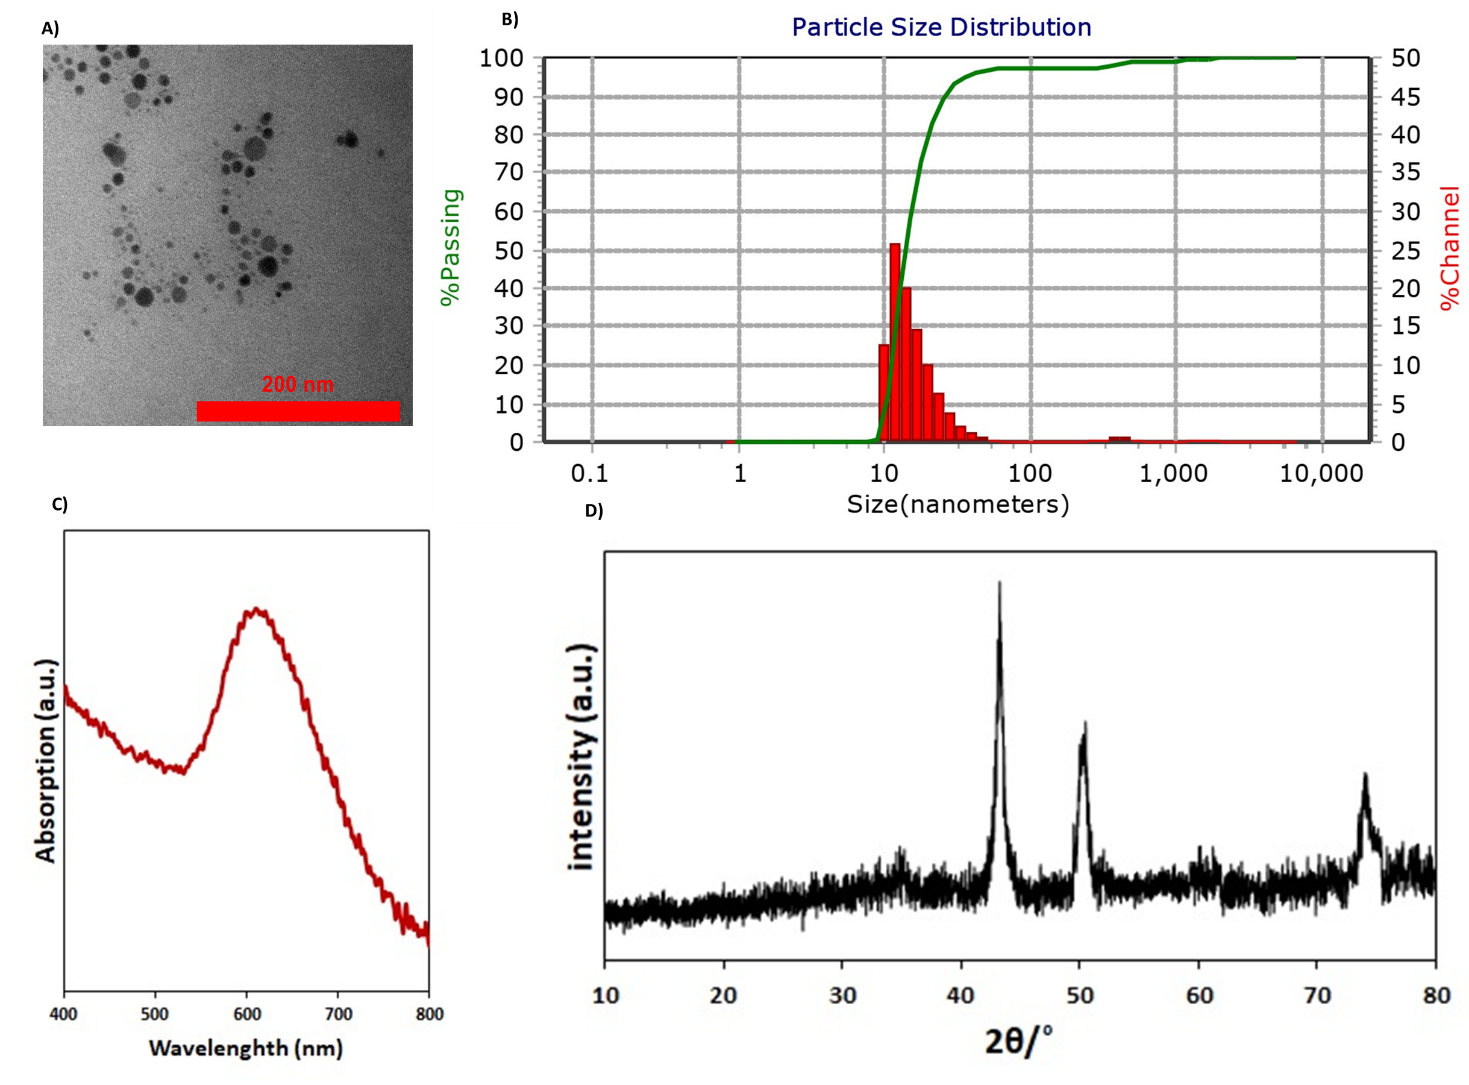


**Supplementary Figure S1. Physicochemical characterization of CuNPs.** (A)TEM image showing predominantly spherical CuNPs with variable size distribution. (B) DLS profile indicating an average particle size of ~40 nm, with a distribution range of 20–50 nm. (C) UV–VIS absorption spectrum exhibiting a strong SPR band at ~600 nm, confirming the formation of metallic CuNPs. (D) XRD pattern demonstrating crystalline structure and high phase purity of CuNPs. CuNPs, copper nanoparticles; TEM, transmission electron microscopy; DLS, dynamic light scattering; UV–VIS, ultraviolet–visible spectroscopy; SPR, surface plasmon resonance; XRD, X-ray diffraction.
